# Supplementary material for: Solid state crystal-to-crystal transformation from a monomeric structure to 1-D coordination polymers on anion exchange,
Source: Royal Society of Chemistry journal article supplement (doi:10.1039/b908362f), 2009-01-01
Supplement: b908362f.pdf [file b908362f.pdf]

Electronic Supplementary Material for CrystEngComm  
This journal is (c) The Royal Society of Chemistry 2009

**Electronic Supplementary Information for MS:**

**Solid State Crystal-to-Crystal Transformation From  
Monomeric Structure to One-dimensional Coordination  
Polymers on Anion Exchange**

**Mojtaba Khanpour, Ali Morsali\***

Department of Chemistry, Faculty of Sciences, Tarbiat Modares University, P.O. Box  
14115-175, Tehran, Islamic Republic of Iran

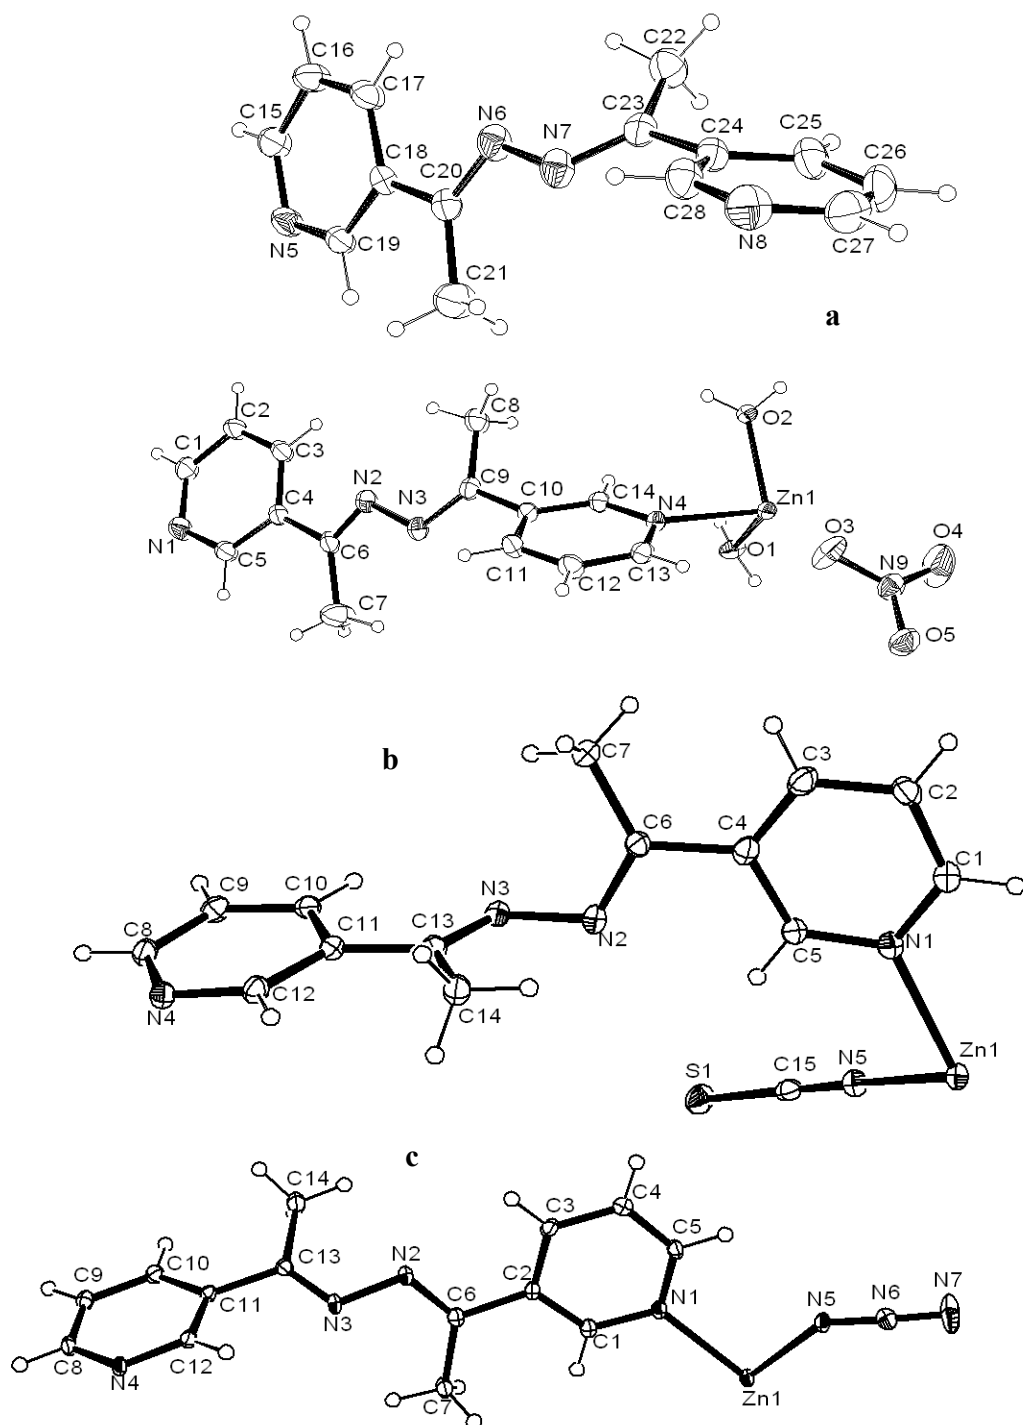

**Figure S1.** ORTEP diagram of the asymmetric unit **a)** compound  $[\text{Zn}(\text{bpdh})_2(\text{H}_2\text{O})_4](\text{NO}_3)_2 \cdot 2\text{bpdh}$  (**1**), **b)** compound  $[\text{Zn}(\mu\text{-bpdh})_2(\text{NCS})_2]_n$  (**2**) and **c)** compound  $[\text{Zn}(\mu\text{-bpdh})_2(\text{N}_3)_2]_n$  (**3**). Ellipsoids 30% probability.

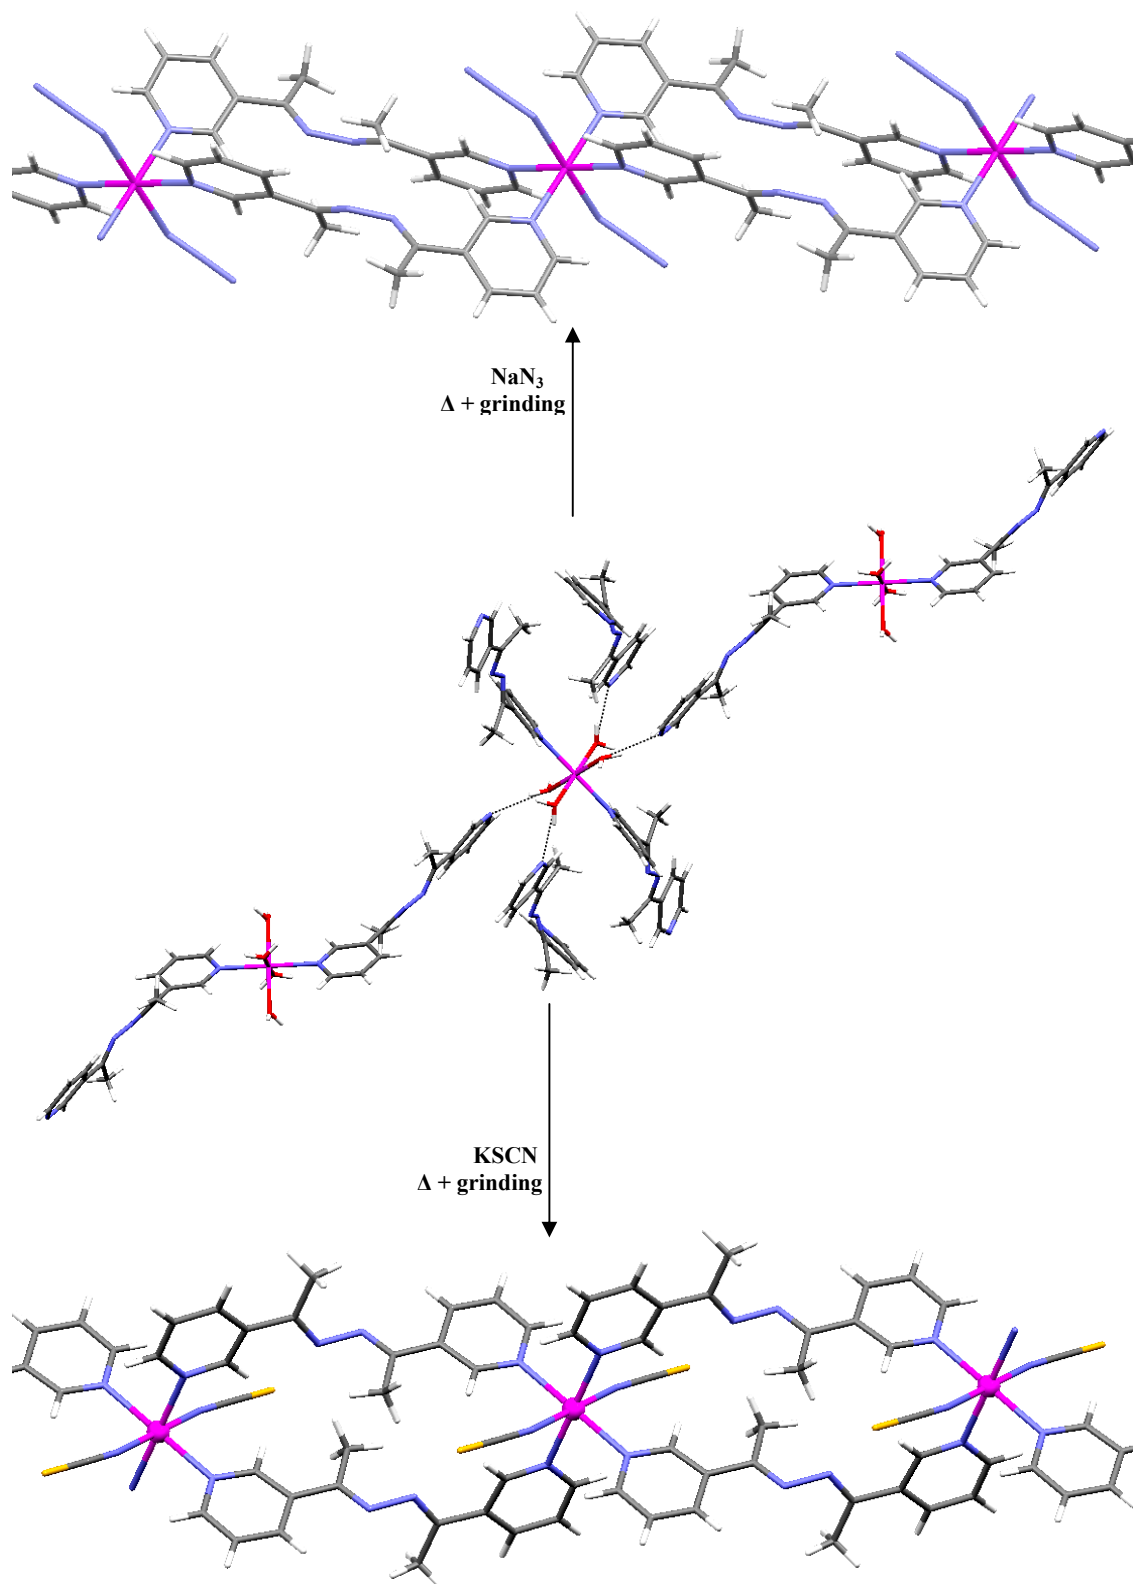

**Figure S2.** Schematic representation of the solid-state conversion of monomeric structure to 1D coordination polymer structures by anion exchange.

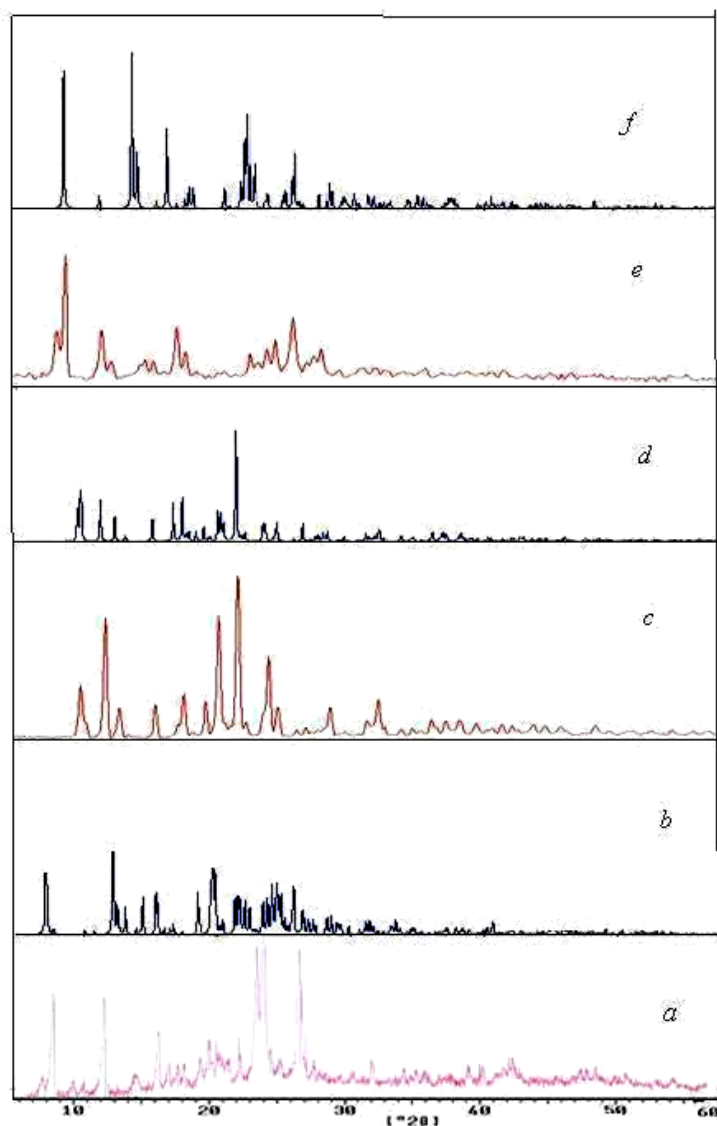

**Figure S3.** The XRD patterns of (a) bulk materials as synthesized of compound **1**; (b) simulated from single crystal X-ray data of compound **1**, (c) bulk materials obtained by anion exchange of compound **1** by potassium thiocyanate; (d) simulated from single crystal X-ray data of compound **2** (e) bulk materials obtained by anion exchange of compound **1** by sodium azide; (d) simulated from single crystal X-ray data of compound **3**.

**Table S1** Crystal data and structure refinement for compound **1-3**.

|                                   |                                                                    |                                                                   |                                                                   |
|-----------------------------------|--------------------------------------------------------------------|-------------------------------------------------------------------|-------------------------------------------------------------------|
| Identification code               | 1                                                                  | 2                                                                 | 3                                                                 |
| Empirical formula                 | C <sub>36</sub> H <sub>64</sub> N <sub>18</sub> O <sub>10</sub> Zn | C <sub>30</sub> H <sub>28</sub> N <sub>10</sub> S <sub>2</sub> Zn | C <sub>14</sub> H <sub>14</sub> N <sub>7</sub> Zn <sub>0.50</sub> |
| Formula weight                    | 1214.62                                                            | 658.15                                                            | 313.01                                                            |
| Temperature                       | 298 K                                                              | 296 K                                                             | 150 K                                                             |
| Wavelength                        | 0.71073 Å                                                          | 0.71073 Å                                                         | 0.71073 Å                                                         |
| Crystal system                    | Monoclinic                                                         | Monoclinic                                                        | Monoclinic                                                        |
| Space group                       | P2 <sub>1</sub> /c                                                 | P2 <sub>1</sub> /n                                                | P2 <sub>1</sub> /c                                                |
| Unit cell dimensions              | a = 8.7682(12) Å                                                   | a = 9.5576(5) Å                                                   | a = 12.618(4) Å                                                   |
|                                   | b = 22.742(3) Å                                                    | b = 16.9548(10) Å                                                 | b = 13.076(4) Å                                                   |
|                                   | c = 14.533(2) Å                                                    | c = 9.6533(5) Å                                                   | c = 8.739(3) Å                                                    |
|                                   | β = 91.819(2)°                                                     | β = 98.630(3)°                                                    | β = 106.414(4)°                                                   |
| Volume                            | 2896.5(7) Å <sup>3</sup>                                           | 1546.6(5) Å <sup>3</sup>                                          | 1383.2(6) Å <sup>3</sup>                                          |
| Z                                 | 2                                                                  | 2                                                                 | 4                                                                 |
| Density (calculated)              | 1.393 Mg/m <sup>3</sup>                                            | 1.413 Mg/m <sup>3</sup>                                           | 1.503 Mg/m <sup>3</sup>                                           |
| Absorption coefficient            | 0.499 mm <sup>-1</sup>                                             | 0.968 mm <sup>-1</sup>                                            | 0.936 mm <sup>-1</sup>                                            |
| F(000)                            | 1272                                                               | 680                                                               | 648                                                               |
| Crystal size                      | 0.31×0.30×0.27 mm <sup>3</sup>                                     | 0.21 ×0.18×0.18 mm <sup>3</sup>                                   | 0.18×0.12×0.10 mm <sup>3</sup>                                    |
| Theta range for data collection   | 1.66 to 25.01°                                                     | 2.40 to 27.58 °                                                   | 3.54 to 2 6.69°                                                   |
| Index ranges                      | -10 ≤ h ≤ 10                                                       | -12 ≤ h ≤ 12                                                      | -15 ≤ h ≤ 15                                                      |
|                                   | -27 ≤ k ≤ 23                                                       | -22 ≤ k ≤ 21                                                      | -16 ≤ k ≤ 15                                                      |
|                                   | 17 ≤ l ≤ 16                                                        | -12 ≤ l ≤ 12                                                      | -10 ≤ l ≤ 11                                                      |
| Reflections collected             | 15072                                                              | 39569                                                             | 10473                                                             |
| Independent reflections           | 5104                                                               | 3576                                                              | 2701                                                              |
| Completeness to theta             | 99.8 %                                                             | 99.8 %                                                            | θ = 25.00°: 100.0 %                                               |
| Absorption correction             | multi-scan                                                         | multi-scan                                                        | multi-scan                                                        |
| Max. and min. transmission        | 0.8608 and 0.8771                                                  | 0.8226 and 0.8451                                                 | 0.8496 and 0.9122                                                 |
| Refinement method                 | Full-matrix least-squares on F <sup>2</sup>                        | Full-matrix least-squares on F <sup>2</sup>                       | Full-matrix least-squares on F <sup>2</sup>                       |
| Data / restraints / parameters    | 5104/6/401                                                         | 3576/0/198                                                        | 2701/0/198                                                        |
| Goodness-of-fit on F <sup>2</sup> | 1.128                                                              | 1.195                                                             | 1.065                                                             |
| Final R. [I > 2σ(I)]              | R1 = 0.0621, wR2 = 0.1346                                          | R1 = 0.0632, wR2 = 0.2025                                         | R1 = 0.0312, wR2 = 0.0697                                         |
| R indices (all data)              | R1 = 0.0718, wR2 = 0.1402                                          | R1 = 0.0739, wR2 = 0.2069                                         | R1 = 0.0492, wR2 = 0.0735                                         |
